# Supplementary material for: Nanoporous alumina-based interferometric transducers ennobled
Source: Royal Society of Chemistry journal article supplement (doi:10.1039/c0nr00897d), 2011-01-01
Supplement: c0nr00897d.pdf [file c0nr00897d.pdf]

## Nanoporous Alumina-based Interferometric Transducers Ennobled

Roman Dronov, Andrew Jane, Joseph G. Shapter, Alastair Hodges, and Nicolas H. Voelcker

### Electronic Supplementary Information

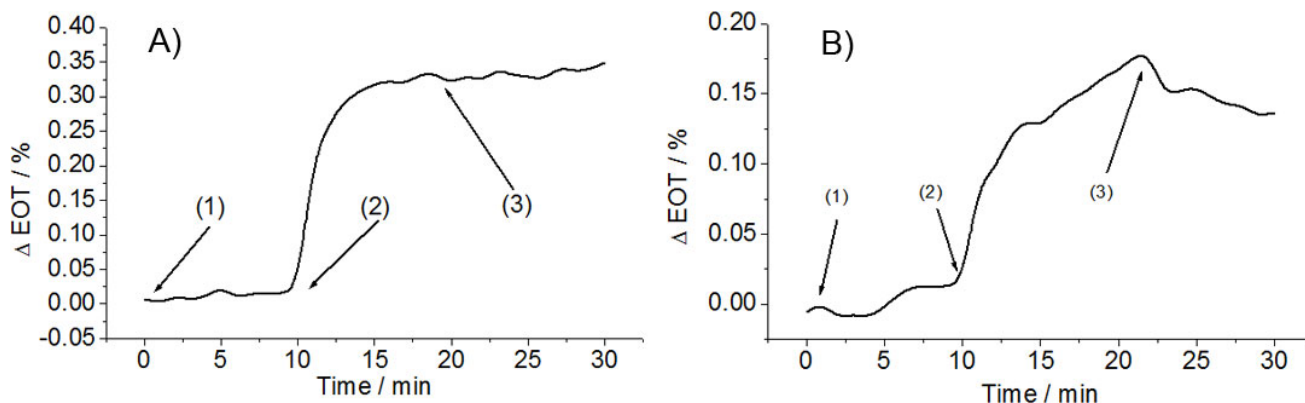

Figure S1. EOT evolution of a composite porous alumina/Pt film upon adsorption of (A) BSA: (1) 10 mM phosphate buffer pH 5.0; (2) 14.7  $\mu$ M BSA in 10 mM phosphate buffer pH 5.0; (3) 10 mM phosphate buffer pH 5.0. B): adsorption of human IgG Ab: (1) 0.5 mM phosphate buffer pH 6.0; (2) 0.6  $\mu$ M human IgG Ab in 0.5 mM phosphate buffer pH 6.0; (3) 0.5 mM phosphate buffer pH 6.0. Porous alumina etching conditions: 0.3 M oxalic acid, 2 min, 100 V, 0°C, followed by chemical etching in 5%  $\text{H}_3\text{PO}_4$  for 150 min at 20°C, hydroxylated in  $\text{H}_2\text{O}_2$ , coated with 15 nm Pt.

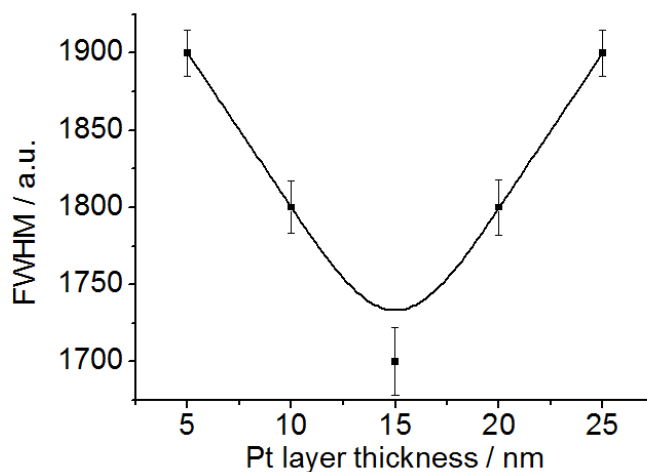

Figure S2. Dependence of the full width at half maximum of the [Fourier transform of](#) interferometric reflectance spectra measured for composite porous alumina/Pt films with various Pt layer thicknesses.

Table S1. Comparison of calculated RIU sensitivities for 1  $\mu\text{m}$  thick porous alumina and porous silicon samples assuming 50% porosity upon pore-filing medium exchange from air to water.

|                                                 | Porous alumina (n=1.768@600 nm) | Porous silicon (n=3.947@600 nm) |
|-------------------------------------------------|---------------------------------|---------------------------------|
| EOT in air (n=1)                                | 1384 nm                         | 2474 nm                         |
| EOT in water (n=1.333)                          | 1550 nm                         | 2640 nm                         |
| $\Delta$ EOT / nm                               | 167 nm                          | 166 nm                          |
| $\Delta$ EOT / %                                | <b>12.07%</b>                   | <b>6.71%</b>                    |
| RIU sensitivity<br>( $\Delta$ EOT / $\Delta$ n) | <b>36.25%</b>                   | <b>20.15%</b>                   |
